# Supplementary material
Source: PubMed Central journal article supplement (PMC4621068)
Supplement: JB.00425-15_zjb999093791so1.pdf [file JB.00425-15_zjb999093791so1.pdf]

## Supporting information

### Materials and Methods

#### *RNA isolation and real-time PCR.*

About  $1 \times 10^9$  bacteria were suspended in RNAprotect bacteria reagent (Qiagen) and pelleted by centrifugation. The cell pellets were stored at  $-80^{\circ}\text{C}$ . Thawed cells were suspended in 1 ml RLT buffer (Qiagen) containing 2-mercaptoethanol and lysed by bead beating. RNA was purified by using the RNeasy minikit (Qiagen). Contaminating DNA was removed with Turbo DNase (Ambion) and RNA was obtained by using RNeasy MiniElute cleanup kit (Qiagen). cDNA was synthesized with the iScript cDNA synthesis kit (BioRad). Comparative RT-PCR was performed on an ABI Prism 7900 system using SYBR Green PCR MasterMix (Applied Biosystems). Each reaction mixture contained 5 ng of cDNA template in a 25- $\mu\text{L}$  volume. Relative transcript levels were determined by the comparative standard curve method. Standard curves were generated by using gene-specific primers with 10 ng to 0.1 pg of RNA-free genomic DNA purified from *B. thailandensis* E264. A dissociation curve step was included at the end of each PCR to verify that a single specific product was amplified and to confirm the absence of primer dimers. The glyceraldehyde 3-phosphate dehydrogenase gene BTH\_I1196 was used as an internal control to verify the absence of significant nonspecific variation between samples.

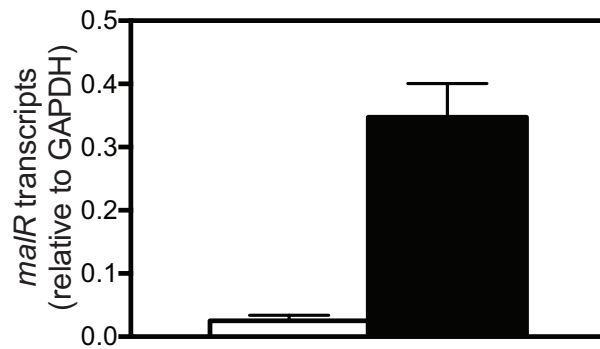

**Fig. S1. The effect of endogenous malleilactone production on *maIR* expression.**

Real-time PCR was used to measure *maIR* transcript abundance in wild-type *B. thailandensis*. Logarithmic phase cells were diluted to an  $OD_{600}$  of 0.05 and grown for 8 h without trimethoprim (white bars) or with 15  $\mu\text{g/ml}$  trimethoprim (black bars) before collecting cells and isolating RNA. Transcript abundance was normalized to glyceraldehyde 3-phosphate dehydrogenase (GAPDH) transcripts. Values represent the mean  $\pm$  range of two independent experiments.

**Table S1. Bacterial strains and plasmids**

| Bacterial strain or plasmid | Strain description                                                                                                                                                                                          | Source or reference |
|-----------------------------|-------------------------------------------------------------------------------------------------------------------------------------------------------------------------------------------------------------|---------------------|
| <b>Strains</b>              |                                                                                                                                                                                                             |                     |
| <i>B. thailandensis</i>     |                                                                                                                                                                                                             |                     |
| E264                        | Wild type                                                                                                                                                                                                   | (1)                 |
| BT01447                     | E264 with an in-frame insertion of the <i>lacZ/hah-Tc</i> transposon in <i>malA</i> after base 5704 out of 8379 with respect to the translation start site                                                  | (2)                 |
| JBT112                      | <i>bta11</i> , <i>bta12</i> , <i>bta13</i> triple mutant of E264                                                                                                                                            | (3)                 |
| TT10                        | JBT112 with the <i>malA-lacZ</i> reporter from BT01447                                                                                                                                                      | This study          |
| TT04                        | BT01447 with a deletion of <i>malR</i>                                                                                                                                                                      | This study          |
| TT05                        | BT01447 <i>glmS1 attn7::dhfrIIb</i> ; TpR                                                                                                                                                                   | This study          |
| TT06                        | TT04 <i>glmS1 attn7::plac dhfrIIb</i> ; TpR                                                                                                                                                                 | This study          |
| TT11                        | TT04 <i>glmS1 attn7::plac-malR dhfrIIb</i> ; TpR                                                                                                                                                            | This study          |
| TT07                        | TT06 with <i>dhfrIIb</i> (TpR) marker excised                                                                                                                                                               | This study          |
| TT08                        | TT11 with <i>dhfrIIb</i> (TpR) marker excised                                                                                                                                                               | This study          |
| <i>E. coli</i>              |                                                                                                                                                                                                             |                     |
| DH5 $\alpha$                | F <sup>-</sup> $\Phi$ 80 <i>lacZ</i> $\Delta$ M15 $\Delta$ ( <i>lacZYA-argF</i> )U169<br><i>hsdR17</i> (r $\kappa^-$ m $\kappa^+$ ) <i>recA1 endA1 phoA supE44 thi-1</i><br><i>gyrA96 relA1</i> $\lambda^-$ | Invitrogen          |
| MG4                         | F <sup>-</sup> $\lambda^-$ <i>ilvG rfb-50 rph-1 recA</i> $\Delta$ ( <i>argF-lacIPOZYA</i> )205                                                                                                              | (4)                 |
| <b>Plasmids</b>             |                                                                                                                                                                                                             |                     |
| pJRC115 <i>btaR4</i>        | Plasmid used to make <i>malR</i> (formerly <i>btaR4</i> ) deletion in TT10                                                                                                                                  | (3)                 |
| pJN105                      | <i>araC-P<sub>araBAD</sub></i> cloned into pBBR1MCS-5; Gm <sup>R</sup>                                                                                                                                      | (5)                 |
| pQF50                       | Broad-host-range <i>lacZ</i> fusion vector; Ap <sup>R</sup>                                                                                                                                                 | (6)                 |
| pFLPe2                      | Source of Flp recombinase                                                                                                                                                                                   | (7)                 |
| pQF50.PmalA                 | pQF50 containing the <i>malA</i> promoter; Ap <sup>R</sup>                                                                                                                                                  | This study          |
| pJN105.malR                 | pJN105 containing the <i>malR</i> gene; Gm <sup>R</sup>                                                                                                                                                     | This study          |
| pQF50.mutPmalA              | pQF50.PmalA with the single-base substitutions T3C and G4A in the putative <i>lux</i> box of the <i>malA</i> promoter; Ap <sup>R</sup>                                                                      | This study          |
| pUC18T-mini-Tn7T-Tp         | Mobilizable mini-Tn7 vector; Tp <sup>R</sup>                                                                                                                                                                | (8)                 |
| pUC18-mini-Tn7T-LAC         | Mobilizable mini-Tn7 vector with the <i>lac</i> promoter ( <i>plac</i> ) for IPTG-inducible expression of genes; Gm <sup>R</sup>                                                                            | (8)                 |
| pUC18-mini-Tn7T-LAC-Tp      | Mobilizable mini-Tn7 vector with <i>plac</i> ; Tp <sup>R</sup>                                                                                                                                              | This study          |
| pUC18-mini-Tn7T-LAC-Tp-malR | pUC18-mini-Tn7T-LAC-Tp containing the <i>malR</i> gene downstream of <i>plac</i>                                                                                                                            | This study          |

## Literature Cited (Table S1).

1. **Brett PJ, DeShazer D, Woods DE.** 1998. *Burkholderia thailandensis* sp. nov., a *Burkholderia pseudomallei*-like species. *Int J Syst Bacteriol* **48 Pt 1**:317-320.
2. **Gallagher LA, Ramage E, Patrapuvich R, Weiss E, Brittnacher M, Manoil C.** 2013. Sequence-Defined Transposon Mutant Library of *Burkholderia thailandensis*. *MBio* **4**.
3. **Chandler JR, Duerkop BA, Hinz A, West TE, Herman JP, Churchill ME, Skerrett SJ, Greenberg EP.** 2009. Mutational analysis of *Burkholderia thailandensis* quorum sensing and self-aggregation. *J Bacteriol* **191**:5901-5909.
4. **Ralling G, Bodrug S, Linn T.** 1985. Growth rate-dependent regulation of RNA polymerase synthesis in *Escherichia coli*. *Mol Gen Genet* **201**:379-386.
5. **Newman JR, Fuqua C.** 1999. Broad-host-range expression vectors that carry the L-arabinose-inducible *Escherichia coli* araBAD promoter and the araC regulator. *Gene* **227**:197-203.
6. **Farinha MA, Kropinski AM.** 1990. Construction of broad-host-range plasmid vectors for easy visible selection and analysis of promoters. *J Bacteriol* **172**:3496-3499.
7. **Choi KH, Mima T, Casart Y, Rholi D, Kumar A, Beacham IR, Schweizer HP.** 2008. Genetic tools for select-agent-compliant manipulation of *Burkholderia pseudomallei*. *Appl Environ Microbiol* **74**:1064-1075.
8. **Choi KH, Schweizer HP.** 2006. mini-Tn7 insertion in bacteria with single attTn7 sites: example *Pseudomonas aeruginosa*. *Nat Protoc* **1**:153-161.
